# Supplementary material for: Elucidation of Sigma Factor-Associated Networks in Pseudomonas aeruginosa Reveals a Modular Architecture with Limited and Function-Specific Crosstalk
Source: PLoS Pathog. 2015 Mar 17;11(3):e1004744. doi: 10.1371/journal.ppat.1004744 (PMC4362757; doi:10.1371/journal.ppat.1004744)
Supplement: S1 Table — (XLSX) [file ppat.1004744.s005.xlsx]

## Sheet: Table S1
Table S1. Primer, vectors and strains used in this study
Strain or vector	Relevant feature(s)	Source or reference
Strains
E. coli DH5α	Strain used for all standard cloning experiments	Woodcock et al., 1989
E. coli S17-1	Mobilizing strain for RP4 Mob-containing plasmids	Simon et al., 1983
PA14	Wild-type reference strain	Liberati et al., 2006
PA14ΔalgU::Gmr	algU::Gmr mutant of PA14 wild-type	This study
PA14ΔfecI::Gmr	fecI::Gmr mutant of PA14 wild-type	This study
PA14ΔfliA::Gmr	fliA::Gmr mutant of PA14 wild-type	This study
PA14ΔfpvI::Gmr	fpvI::Gmr mutant of PA14 wild-type	This study
PA14ΔpvdS::Gmr	pvdS::Gmr mutant of PA14 wild-type	This study
PA14ΔrpoN::Gmr	rpoN::Gmr mutant of PA14 wild-type	This study
PA14ΔrpoN	rpoN mutant of PA14 wild-type	This study
PA14ΔrpoS::Gmr	rpoS::Gmr mutant of PA14 wild-type	This study
PA14ΔsigX::Gmr	sigX::Gmr mutant of PA14 wild-type	This study
PA14ΔsigX	sigX mutant of PA14 wild-type	This study
Vectors
pJN105	Broad-host range vector pBBR1-MCS5 harboring araC-PBAD cassette from pBAD18, Gmr	Newman and Fuqua, 1999
pJN105-RBS-algU	algU-ORF with optimized start and stop codon and preceding RBS cloned into pJN105 using EcoRI and XbaI sites, Gmr	This study
pJN105-RBS-fecI	fecI-ORF (PA14_13460) with optimized start and stop codon and preceding RBS cloned into pJN105 using EcoRI and XbaI sites, Gmr	This study
pJN105-RBS-fecI2	fecI2-ORF (PA14_27690) with optimized start and stop codon and preceding RBS cloned into pJN105 using EcoRI and XbaI sites, Gmr	This study
pJN105-RBS-fliA	fliA-ORF with optimized start and stop codon and preceding RBS cloned into pJN105 using EcoRI and XbaI sites, Gmr	This study
pJN105-RBS-fpvI	fpvI-ORF with optimized start and stop codon and preceding RBS cloned into pJN105 using EcoRI and XbaI sites, Gmr	This study
pJN105-RBS-pvdS	pvdS-ORF with optimized start and stop codon and preceding RBS cloned into pJN105 using EcoRI and XbaI sites, Gmr	This study
pJN105-RBS-rpoH	rpoH-ORF with optimized start and stop codon and preceding RBS cloned into pJN105 using EcoRI and XbaI sites, Gmr	This study
pJN105-RBS-rpoN	rpoN-ORF with optimized start and stop codon and preceding RBS cloned into pJN105 using EcoRI and XbaI sites, Gmr	This study
pJN105-RBS-rpoS	rpoS-ORF with optimized start and stop codon and preceding RBS cloned into pJN105 using EcoRI and XbaI sites, Gmr	This study
pJN105-RBS-sigX	sigX-ORF with optimized start and stop codon and preceding RBS cloned into pJN105 using EcoRI and XbaI sites, Gmr	This study
pJN105-RBS-algU-his8	algU-ORF with optimized start and stop codon, preceding RBS and C-terminal 8xHis coding sequence cloned into pJN105 using EcoRI and XbaI sites, Gmr	This study
pJN105-RBS-fecI-his8	fecI-ORF (PA14_13460) with optimized start and stop codon, preceding RBS and C-terminal 8xHis coding sequence cloned into pJN105 using EcoRI and XbaI sites, Gmr	This study
pJN105-RBS-fecI2-his8	fecI2-ORF (PA14_27690) with optimized start and stop codon, preceding RBS and C-terminal 8xHis coding sequence cloned into pJN105 using EcoRI and XbaI sites, Gmr	This study
pJN105-RBS-fliA-his8	fliA-ORF with optimized start and stop codon, preceding RBS and C-terminal 8xHis coding sequence cloned into pJN105 using EcoRI and XbaI sites, Gmr	This study
pJN105-RBS-fpvI-his8	fpvI-ORF with optimized start and stop codon, preceding RBS and C-terminal 8xHis coding sequence cloned into pJN105 using EcoRI and XbaI sites, Gmr	This study
pJN105-RBS-pvdS-his8	pvdS-ORF with optimized start and stop codon, preceding RBS and C-terminal 8xHis coding sequence cloned into pJN105 using EcoRI and XbaI sites, Gmr	This study
pJN105-RBS-rpoD-his8	rpoD-ORF with optimized start and stop codon, preceding RBS and C-terminal 8xHis coding sequence cloned into pJN105 using EcoRI and XbaI sites, Gmr	This study
pJN105-RBS-rpoH-his8	rpoH-ORF with optimized start and stop codon, preceding RBS and C-terminal 8xHis coding sequence cloned into pJN105 using EcoRI and XbaI sites, Gmr	This study
pJN105-RBS-rpoN-his8	rpoN-ORF with optimized start and stop codon, preceding RBS and C-terminal 8xHis coding sequence cloned into pJN105 using EcoRI and XbaI sites, Gmr	This study
pJN105-RBS-rpoS-his8	rpoS-ORF with optimized start and stop codon, preceding RBS and C-terminal 8xHis coding sequence cloned into pJN105 using EcoRI and XbaI sites, Gmr	This study
pJN105-RBS-sigX-his8	sigX-ORF with optimized start and stop codon, preceding RBS and C-terminal 8xHis coding sequence cloned into pJN105 using EcoRI and XbaI sites, Gmr	This study
pUC18-mini-Tn7T-Gm-lacZ	pUC18 derivate encoding mini-Tn7 element with transcriptional terminators and lacZ fusion, Gmr	Choi and Schweizer, 2006
pFLP3	FLP expression vector, sacB+, oriT+, Apr, Tetr	Choi and Schweizer, 2006
pEX18Ap	gene replacement vector with MCS from pUC18, oriT+, sacB+, Apr	Hoang et al., 1998
pEX18Ap2	pEX18Ap derivate, 845 bp fragment containing 5S rRNA, lacZ alpha and MCS removed by inverse PCR, novel MCS generated with unique restriction sites for XhoI, PstI, SmaI/XmaI, XbaI, SacI, HindIII, NheI, NotI, MluI, KpnI, BamHI, EcoRI, Apr	This study
pEX18Ap2-up-algU-down-algU	pEX18Ap2 harboring 484 bp upstream and 498 bp downstream region of algU ORF with a junction sequence encoding for a KpnI-site and three shifted stop codons, Apr	This study
pEX18Ap2-up-fecI-down-fecI	pEX18Ap2 harboring 464 bp upstream and 491 bp downstream region of fecI ORF (PA14_13460) with a junction sequence encoding for a KpnI-site and three shifted stop codons, Apr	This study
pEX18Ap2-up-fliA-down-fliA	pEX18Ap2 harboring 500 bp upstream and 462 bp downstream region of fliA ORF with a junction sequence encoding for a KpnI-site and three shifted stop codons, Apr	This study
pEX18Ap2-up-fpvI-down-fpvI	pEX18Ap2 harboring 474 bp upstream and 474 bp downstream region of fpvI ORF with a junction sequence encoding for a KpnI-site and three shifted stop codons, Apr	This study
pEX18Ap2-up-pvdS-down-pvdS	pEX18Ap2 harboring 491 bp upstream and 471 bp downstream region of pvdS ORF with a junction sequence encoding for a KpnI-site and three shifted stop codons, Apr	This study
pEX18Ap2-up-rpoN-down-rpoN	pEX18Ap2 harboring 487 bp upstream and 483 bp downstream region of rpoN ORF with a junction sequence encoding for a XmaI-site and three shifted stop codons, Apr	This study
pEX18Ap2-up-rpoS-down-rpoS	pEX18Ap2 harboring 450 bp upstream and 485 bp downstream region of rpoS ORF with a junction sequence encoding for a KpnI-site and three shifted stop codons, Apr	This study
pEX18Ap2-up-sigX-down-sigX	pEX18Ap2 harboring 485 bp upstream and 381 bp downstream region of sigX ORF with a junction sequence encoding for a KpnI-site and three shifted stop codons, Apr	This study
pBBR1-MCS5-TT-RBS-lux	Broad-host range vector pBBR1-MCS5 harboring luxCDABE and terminators lambda T0 rrnB1 T1 for plasmid-based transcriptional fusions, Gmr	Godeke et al., 2011
pBBR1-MCS5-TT- PaccB-RBS-lux	-254,-144 fragment upstream of accB-ORF cloned into pBBR1-MCS5-TT-RBS-lux using BamHI and EcoRI sites, Gmr	This study
pBBR1-MCS5-TT- PalgU-RBS-lux	-110,+1 fragment upstream of algU-ORF cloned into pBBR1-MCS5-TT-RBS-lux using SpeI and HindIII sites, Gmr	This study
pBBR1-MCS5-TT- PcheY2-RBS-lux	-210,+1 fragment upstream of cheY2-ORF (PA14_02260) cloned into pBBR1-MCS5-TT-RBS-lux using SpeI and HindIII sites, Gmr	This study
pBBR1-MCS5-TT-PflhA-RBS-lux	-119,+1 fragment upstream of flhA-ORF cloned into pBBR1-MCS5-TT-RBS-lux using SpeI and HindIII sites, Gmr	This study
pBBR1-MCS5-TT-PfliC-RBS-lux	-146,+1 fragment upstream of fliC-ORF cloned into pBBR1-MCS5-TT-RBS-lux using SpeI and HindIII sites, Gmr	This study
pBBR1-MCS5-TT- PgrpE-RBS-lux	-121,+1 fragment upstream of grpE-ORF cloned into pBBR1-MCS5-TT-RBS-lux using SpeI and HindIII sites, Gmr	This study
pBBR1-MCS5-TT- PpvdS-RBS-lux	-500,+1 fragment upstream of pvdS-ORF cloned into pBBR1-MCS5-TT-RBS-lux using SacI and BamHI sites, Gmr	This study
Primer (engineered restriction site)	Sequence (5'->3')	Function
algU-FW (EcoRI)	ACTGGAATTCTTAACTTTAAGGAGGAGATATAATGCTAACCCAGGAACAGGATCA	RNA-and ChIP-seq experiments
algU-RV (XbaI)	ACTGTCTAGATCAGGCTTCTCGCAACAAAGG	RNA-seq experiments
algU-His8-RV (XbaI)	ACTGTCTAGATCAGTGGTGGTGGTGGTGGTGGTGGTGCTCCAGGGCTTCTCGCAACAAAGGCT	8xHis-tagging for ChIP-seq experiments
fecI-FW (EcoRI)	ACTGGAATTCTTAACTTTAAGGAGGAGATATAATGTCGAGCGCCGACCTCG	RNA-and ChIP-seq experiments
fecI-RV (XbaI)	ACTGTCTAGACTATCATGGCAGCTCGGCGAAGTA	RNA-seq experiments
fecI-His8-RV (XbaI)	ACTGTCTAGACTATCAGTGGTGGTGGTGGTGGTGGTGGTGCTCCAGTGGCAGCTCGGCGAAGTAGCA	8xHis-tagging for ChIP-seq experiments
fecI2-FW (EcoRI)	ACTGGAATTCTTAACTTTAAGGAGGAGATATAATGGATCGTCCGAATCAGCC	RNA-and ChIP-seq experiments
fecI2-RV (XbaI)	ACTGTCTAGACTATCAGGAATGAACGCGGCTG	RNA-seq experiments
fecI2-His8-RV (XbaI)	ACTGTCTAGACTATCAGTGGTGATGGTGGTGATGGTGGTGCTCCAGGGAATGAACGCGGCTGC	8xHis-tagging for ChIP-seq experiments
fliA-FW (EcoRI)	ACTGGAATTCTTAACTTTAAGGAGGAGATATAATGACAGCGGCCTCTGGAGTGCG	RNA-and ChIP-seq experiments
fliA-RV (XbaI)	ACTGTCTAGATCAGGCCGACCGCCAATCG	RNA-seq experiments
fliA-His8-RV (XbaI)	ACTGTCTAGATCAGTGGTGGTGGTGGTGGTGGTGGTGCTCCAGGGCCGACCGCCAATCGGC	8xHis-tagging for ChIP-seq experiments
fpvI-FW (EcoRI)	ACTGGAATTCTTAACTTTAAGGAGGAGATATAATGGAAAACCATTATCGGGAGCTG	RNA-and ChIP-seq experiments
fpvI-RV (XbaI)	ACTGTCTAGACTATCAGTCGGCTTCCCATTCGC	RNA-seq experiments
fpvI-His8-RV (XbaI)	ACTGTCTAGATCAGTGGTGGTGGTGGTGGTGGTGGTGCTCCAGGTCGGCTTCCCATTCGCG	8xHis-tagging for ChIP-seq experiments
pvdS-FW (EcoRI)	ACTGGAATTCTTAACTTTAAGGAGGAGATATAATGTCGGAACAACTGTCTACCCGCAG	RNA-and ChIP-seq experiments
pvdS-RV (XbaI)	ACTGTCTAGATCAGCGACGGGCGCTGAGA	RNA-seq experiments
pvdS-His8-RV (XbaI)	ACTGTCTAGATCAGTGGTGGTGGTGGTGGTGGTGGTGCTCCAGGCGACGGGCGCTGAGATG	8xHis-tagging for ChIP-seq experiments
rpoD-FW (EcoRI)	ACTGGAATTCTTAACTTTAAGGAGGAGATATAATGTCCGGAAAAGCGCAACA	RNA-and ChIP-seq experiments
rpoD-RV (XbaI)	ACTGTCTAGACTATCACTCGTCGAGGAAGGAGCG	RNA-seq experiments
rpoD-His8-RV (XbaI)	ACTGTCTAGATCAGTGGTGGTGGTGGTGGTGGTGGTGCTCCAGCTCGTCGAGGAAGGAGCGCA	8xHis-tagging for ChIP-seq experiments
rpoH-FW (EcoRI)	ACTGGAATTCTTAACTTTAAGGAGGAGATATAATGACCACTTCTTTGCAACCTGTACAT	RNA-and ChIP-seq experiments
rpoH-RV (XbaI)	ACTGTCTAGATCAGGCGAGAATCCGCCCT	RNA-seq experiments
rpoH-His8-RV (XbaI)	ACTGTCTAGATCAGTGGTGGTGGTGGTGGTGGTGGTGCTCCAGGGCGAGAATCCGCCCTTT	8xHis-tagging for ChIP-seq experiments
rpoN-FW (EcoRI)	ACTGGAATTCTTAACTTTAAGGAGGAGATATAATGAAACCATCGCTAGTCCTCAAGA	RNA-and ChIP-seq experiments
rpoN-RV (XbaI)	ACTGTCTAGATCACACCAGTCGCTTGCG	RNA-seq experiments
rpoN-His8-RV (XbaI)	ACTGTCTAGATCAGTGGTGGTGGTGGTGGTGGTGGTGCTCCAGCACCAGTCGCTTGCGCTC	8xHis-tagging for ChIP-seq experiments
rpoS-FW (EcoRI)	ACTGGAATTCTTAACTTTAAGGAGGAGATATAATGGCACTCAAAAAAGAAGGGC	RNA-and ChIP-seq experiments
rpoS-RV (XbaI)	ACTGTCTAGACTATCACTGGAACAGCGCGTCA	RNA-seq experiments
rpoS-His8-RV (XbaI)	ACTGTCTAGACTATCAGTGGTGATGGTGGTGATGGTGGTGCTCCAGCTGGAACAGCGCGTCACTC	8xHis-tagging for ChIP-seq experiments
sigX-FW (EcoRI)	ACTGGAATTCTTAACTTTAAGGAGGAGATATAATGAATAAGCCTCACCCCCTGTC	RNA-and ChIP-seq experiments
sigX-RV (XbaI)	ACTGTCTAGATCATGTTTCGGTCGCATCTGAAAACT	RNA-seq experiments
sigX-His8-RV (XbaI)	ACTGTCTAGATCAGTGGTGGTGGTGGTGGTGGTGGTGCTCCAGTGTTTCGGTCGCATCTGAAAACT	8xHis-tagging for ChIP-seq experiments
T7-promoter-BpmI-(dA)15 (BpmI)	CGAAATTAATACGACTCACTATAGGGCTGGAGAAAAAAAAAAAAAAA	ChIP-seq experiments
T7-promoter-BpmI-(dA)18 (BpmI)	CGAAATTAATACGACTCACTATAGGGCTGGAGAAAAAAAAAAAAAAAAAA	ChIP-seq experiments
iPCRpEX18Ap-CW (EcoRV)	ATCGGATATCGCTAGCGCGGCCGCACGCGTGGTACCGGATCCGAATTCGCCAGCTGCATTAATGAATCGG	inverse PCR to construct pEX18Ap2
iPCRpEX18Ap-ACW (EcoRV)	ATCGGATATCCTCGAGCTGCAGCCCGGGTCTAGAGAGCTCAAGCTTTCAAATATGCGCCTGATGCG	inverse PCR to construct pEX18Ap2
Mut-algU-up-FW (BamHI)	ATCGGGATCCGAAGGGTCAAGGCCAGACTCAG	mutagenesis
Mut-algU-up-RV (KpnI)	CAGTCAGTCAGGTACCGAAAGCTCCTCTTCGAACCTGGAG	mutagenesis
Mut-algU-down-FW (KpnI)	GGTACCTGACTGACTGACACAGCGGCAAATGCCAAG	mutagenesis
Mut-algU-down-RV (NotI)	ATCGGCGGCCGCGTATCGCTGGACGAGGAGTTGG	mutagenesis
Mut-fecI-up-FW (BamHI)	ACTGGAATTCCGGCAGGCGTACCGACGTG	mutagenesis
Mut-fecI-up-RV (KpnI)	TCAGTCAGTCAGGTACCCTGGACATTCCCGGAGCAGAAGG	mutagenesis
Mut-fecI-down-FW (KpnI)	GGTACCTGACTGACTGAGCCTGCCCGCCGCACCCA	mutagenesis
Mut-fecI-down-RV (NotI)	ATCGGCGGCCGCGTCGTGGCCGGTGCTGAGCTG	mutagenesis
Mut-fliA-up-RV (KpnI)	TCAGTCAGTCAGGTACCACGGCCGAACCTGTCGC	mutagenesis
Mut-fliA-up-FW (BamHI)	ATCGGGATCCTTCAGCGATATCAGCGACAACC	mutagenesis
Mut-fliA-down-FW (KpnI)	GGTACCTGACTGACTGAACCGGCCTCGACCGCAG	mutagenesis
Mut-fliA-down-RV (NotI)	ATCGGCGGCCGCGCTCGAAAATCTTCTCGATCTTTTCC	mutagenesis
Mut-fpvI-up-FW (BamHI)	ATCGGGATCCGCCGTCGGCAACATAAGCA	mutagenesis
Mut-fpvI-up-RV (KpnI)	CAGTCAGTCAGGTACCGACGACTCCTGCTCGCTGC	mutagenesis
Mut-fpvI-down-FW (KpnI)	GGTACCTGACTGACTGATTTCGCTATTCGTGCTCGGC	mutagenesis
Mut-fpvI-down-RV (NotI)	ATCGGCGGCCGCGCGCAGGTAGTCGTTGAACTCC	mutagenesis
Mut-pvdS-up-FW (BamHI)	ATCGGGATCCATTAGCGCATGTAACCGCAATCTC	mutagenesis
Mut-pvdS-up-RV (KpnI)	CAGTCAGTCAGGTACCGGAAATCACCTTGCTGCGGA	mutagenesis
Mut-pvdS-down-FW (KpnI)	GGTACCTGACTGACTGACGGCGGCGAGCATTCCT	mutagenesis
Mut-pvdS-down-RV (NotI)	ATCGGCGGCCGCCAGCCTCCAGCCTGTCGTTTC	mutagenesis
Mut-rpoN-up-FW (PstI)	ATCGCTGCAGGCCGAAATTCATCCTCCTCGA	mutagenesis
Mut-rpoN-up-RV (XmaI)	TCAGTCAGTCACCCGGGGGCTGAGGGCTTAGTACCTTATTCG	mutagenesis
Mut-rpoN-down-FW (XmaI)	CCCGGGTGACTGACTGACGTTGATCCACGCCAAGGT	mutagenesis
Mut-rpoN-down-RV (HindIII)	ATCGAAGCTTTTGTTCGAGTACGCGTTTCTTGCT	mutagenesis
Mut-rpoS-up-FW (BamHI)	ACTGGAATTCCGGTAGTCTGATCGGCCGTTTT	mutagenesis
Mut-rpoS-up-RV (KpnI)	TCAGTCAGTCAGGTACCGTCGTTATCCCTTGCATGAGTTCG	mutagenesis
Mut-rpoS-down-FW (KpnI)	GGTACCTGACTGACTGACGGAAAACCTTAGACCCACTGAAGA	mutagenesis
Mut-rpoS-down-RV (NotI)	ATCGGCGGCCGCCTGCCCGACGCTGAGGAAT	mutagenesis
Mut-sigX-up-FW (BamHI)	ATCGGGATCCCAACTGGTGAACAGCGTCGTG	mutagenesis
Mut-sigX-up-RV (KpnI)	CAGTCAGTCAGGTACCGTGAGATCAGGCCAGTCATATCGT	mutagenesis
Mut-sigX-down-FW (KpnI)	GGTACCTGACTGACTGATTGGGTAAATATTGTCTCTCTATGCGG	mutagenesis
Mut-sigX-down-RV (NotI)	ATCGGCGGCCGCGTTGCCGTGGACCTTCTTGTT	mutagenesis
FRT-Gm-FRT-FW (KpnI)	GTCAGGGTACCACGATCGAATTGGGGATCTTG	mutagenesis
FRT-Gm-FRT-RV (KpnI)	GTCAGGGTACCTGCATGATCGAATTAGCTTCAAAAG	mutagenesis
FRT-Gm-FRT-FW2 (XmaI)	TCAGCCCGGGACGATCGAATTGGGGATCTTG	mutagenesis
FRT-Gm-FRT-RV2 (XmaI)	TCAGCCCGGGTGCATGATCGAATTAGCTTCAAAA	mutagenesis
PaccB-FW (BamHI)	AGTCGGATCCCATCATCATCAATCCGGCG	bioluminescence assay
PaccB-RV (EcoRI)	AGTCGAATTCGTTTGTGCACGTTCGACAGG	bioluminescence assay
PalgU-FW (SpeI)	ACTGACTAGTCTCGTGACGCATGCTTGGA	bioluminescence assay
PalgU-RV (HindIII)	ACTGAAGCTTGAAAGCTCCTCTTCGAACCTGG	bioluminescence assay
PcheY2-FW2 (SpeI)	ACTGACTAGTGGAATTGTTCTGAGGGGTATCGA	bioluminescence assay
PcheY2-RV (HindIII)	ACTGAAGCTTGGTCTTGCGTCCTCACGGT	bioluminescence assay
PflhA-FW (SpeI)	ACTGACTAGTATCAATGAATTGAAAAGTTGGAACG	bioluminescence assay
PflhA-RV (HindIII)	ACTGAAGCTTTCTCGACTCCCCTGCCCT	bioluminescence assay
PfliC-FW (SpeI)	ACTGACTAGTAAAAAGAAAATGTTGATTTTTTCTCTAAAGCTC	bioluminescence assay
PfliC-RV (HindIII)	ACTGAAGCTTGGTGATTTCCTCCAAAGGACCTATTT	bioluminescence assay
PgrpE-FW (SpeI)	ACTGACTAGTTTCCGGCTGGCAATTGCC	bioluminescence assay
PgrpE-RV (HindIII)	ACTGAAGCTTGCCACTCTCCTTCAAAAATAAGCTGG	bioluminescence assay
PpvdS-FW (SacI)	ACTGGAGCTCTTAGCGCATGTAACCGCAATCTC	bioluminescence assay
PpvdS-RV (BamHI)	ACTGGGATCCGGAAATCACCTTGCTGCGGA	bioluminescence assay
Seq-pJN-FW2	TCCACATTGATTATTTGCACGG	DNA sequencing pJN105
Seq-pJN-RV2	ATTAAGTTGGGTAACGCCAGGG	DNA sequencing pJN105
Seq-pEX18Ap2-FW	CTGGCCGAGTGGGTTGAAT	DNA sequencing pEX18Ap2
Seq-pEX18Ap2-RV	CGCAGCGAGTCAGTGAGC	DNA sequencing pEX18Ap2
Seq-pBBR-LuX-FW	TATCTGTTGTTTGTCGGTGAACG	DNA sequencing pBBR1-MCS5-TT-RBS-lux
Seq-pBBR-LuX-RV	GCAACCGTAATTCGTTATTTCCA	DNA sequencing pBBR1-MCS5-TT-RBS-lux
Seq-mut-Gm-FW	TTACCACCGCTGCGTTCG	DNA sequencing mutant check
Seq-mut-Gm-RV	CTAACAATTCGTTCAAGCCGAGA	DNA sequencing mutant check
Apr, ampicillin resistance; FLP, flippase; Gmr, gentamicin resistance; MCS, multiple cloning site; ORF, open reading frame; oriT, origin of transfer; RBS, ribosomal binding site; Tetr, tetracycline resistance
