# Supplementary material for: Elucidation of Sigma Factor-Associated Networks in Pseudomonas aeruginosa Reveals a Modular Architecture with Limited and Function-Specific Crosstalk
Source: PLoS Pathog. 2015 Mar 17;11(3):e1004744. doi: 10.1371/journal.ppat.1004744 (PMC4362757; doi:10.1371/journal.ppat.1004744)
Supplement: S7 Table — (XLSX) [file ppat.1004744.s011.xlsx]

## Sheet: Table S7
Table S7. Statistical analyses of the definition of primary sigma factor regulons
	P value of the intersection
Sigma factor	ChIP-seq and RNA-seq	ChIP-seq and motif scan	RNA-seq and motif scan
AlgU	0	2.02e-06	3.03e-11
FliA	2.22e-16	0.9982	0.0226
RpoH	3.78e-05	0.0029	0.0095
RpoN	0	0.0481	0.0279
RpoS*	0	1.11e-16	0
PvdS	0	5.3e-11	1.44e-15
SigX	1.71e-13	0.4688	0.0001
FpvI	0.0004	0.0075	0.0383
FecI	0.0758	5.5e-06	0.0002
FecI2	0.0067	0.0707	0.001
RpoD**	2.94e-13	1.71e-14	0.00053
* ChIPseq & ChIPchip
** 3 Motifs
