# Supplementary material for: Elucidation of Sigma Factor-Associated Networks in Pseudomonas aeruginosa Reveals a Modular Architecture with Limited and Function-Specific Crosstalk
Source: PLoS Pathog. 2015 Mar 17;11(3):e1004744. doi: 10.1371/journal.ppat.1004744 (PMC4362757; doi:10.1371/journal.ppat.1004744)
Supplement: S8 Table — (XLSX) [file ppat.1004744.s012.xlsx]

## Sheet: Table S8
Table S8. Pseudocap enrichment of functional classes in the sigma factor regulons.
AlgU				SigX
PseudoCAP category	EF*	P value		PseudoCAP category	EF*	P value
Cell division	2.26648	0.0150443		Secreted factors (toxins, enzymes, alginate)	3.22173	6.2846e-07
Secreted factors (toxins, enzymes, alginate)	2.03841	0.00429313		Protein secretion / Export apparatus	2.56128	1.65002e-06
Antibiotic resistance and susceptibility	1.93266	0.0135579		Translation, post-translational modification and degradation	1.98548	9.65597e-05
Cell wall / LPS / capsule	1.81175	0.00185236		Fatty acid and phospholipid metabolism	1.70752	0.00555193
Carbon compound catabolism	1.42058	0.0422673		Transcription, RNA processing and degradation	1.52912	0.0956205
Adaptation / Protection	1.4112	0.0522011		Energy metabolism	1.50173	0.0125604
Protein secretion / Export apparatus	1.38507	0.0748736		Chaperones / Heat shock proteins	1.44705	0.12958
Fatty acid and phospholipid metabolism	1.3455	0.0810274		Motility / Attachment	1.37518	0.096512
Two-component regulatory systems	1.23882	0.170971		Biosynthesis of cofactors, prosthetic groups and carriers	1.27665	0.122823
FliA				RpoS
PseudoCAP category	EF*	P value		PseudoCAP category	EF*	P value
Chemotaxis	7.80204	0		Chemotaxis	3.02844	0.000384443
Adaptation / Protection	3.39054	2.62568e-13		Motility / Attachment	2.48779	9.95955e-05
Motility / Attachment	3.33094	1.4981e-09		Two-component regulatory systems	1.91864	0.00493807
Secreted factors (toxins, enzymes, alginate)	2.26036	0.00118611		Protein secretion / Export apparatus	1.83053	0.0063764
Related to phage, transposon or plasmid	1.76435	0.0254065		Adaptation / Protection	1.65136	0.0146142
Cell wall / LPS / capsule	1.45998	0.0392613		Energy metabolism	1.47575	0.0249176
Protein secretion / Export apparatus	1.3311	0.10394		DNA replication, recombination, modification and repair	1.2387	0.197222
RpoH				PvdS
PseudoCAP category	EF*	P value		PseudoCAP category	EF*	P value
Chaperones / Heat shock proteins	4.85264	1.82581e-06		Adaptation / Protection	5.09978	2.80069e-08
Motility / Attachment	2.44556	0.000573486		Secreted factors (toxins, enzymes, alginate)	3.39985	0.00343482
Energy metabolism	2.11953	0.000116687		Protein secretion / Export apparatus	2.80299	0.00342548
Adaptation / Protection	1.71882	0.0163127		Energy metabolism	1.40867	0.133639
Putative enzymes	1.21625	0.107504		Biosynthesis of cofactors, prosthetic groups and carriers	1.34723	0.175809
Antibiotic resistance and susceptibility	1.21059	0.234845		Putative enzymes	1.23496	0.177521
RpoN				RpoD
PseudoCAP category	EF*	P value		PseudoCAP category	EF*	P value
Motility / Attachment	2.24233	2.29146e-07		Chaperones / Heat shock proteins	1.80534	0.00480378
Chemotaxis	2.14171	0.000588357		Protein secretion / Export apparatus	1.62731	0.000271503
Translation, post-translational modification and degradation	1.75986	1.04066e-05		Related to phage, transposon or plasmid	1.57851	0.00786447
Nucleotide biosynthesis and metabolism	1.52677	0.0232332		Amino acid biosynthesis and metabolism	1.32709	0.00702281
Non-coding RNA gene (sRNA)	1.46263	0.0981039		Translation, post-translational modification and degradation	1.26435	0.0313556
Central intermediary metabolism	1.39072	0.0328528		Secreted factors (toxins, enzymes, alginate)	1.25607	0.10763
Antibiotic resistance and susceptibility	1.29499	0.123331		Cell wall / LPS / capsule	1.19893	0.0941143
Protein secretion / Export apparatus	1.28503	0.0677375
Transcription, RNA processing and degradation	1.27864	0.152616
Cell wall / LPS / capsule	1.25864	0.0712345
* - starting from 1,2
